# Supplementary material for: Soil Moisture and Soluble Salt Content Dominate Changes in Foliar δ13C and δ15N of Desert Communities in the Qaidam Basin, Qinghai-Tibetan Plateau
Source: Front Plant Sci. 2021 Jul 8;12:675817. doi: 10.3389/fpls.2021.675817 (PMC8297661; doi:10.3389/fpls.2021.675817)
Supplement: Supplementary file 3 [file Table_3.XLSX]

## Sheet: Sheet1
TABLE 3 Main effects of environmental variables on δ15N and δ13C in multivariate linear models. d.f., the degree of freedom; SS, sum square, F, variance ratio; P, significance level; η2, Eta squared, the percentage of sum squares explained. See other abbreviations in Tables 1 and 2
	d.f.	SS	F	P	η2(%)
δ15N
GST	1	74.32	265.95	< 0.01	28.04
GSP	1	16.58	59.34	< 0.01	6.26
Aridity	1	1.04	3.72	0.07	0.39
STN	1	5.51	19.73	< 0.01	2.08
SOC	1	47.05	168.38	< 0.01	17.75
Soil moisture	1	111.63	399.47	< 0.01	42.12
pH	1	1.92	6.86	< 0.05	0.72
Residuals	25	6.99
δ13C
GST	1	60.84	13.54	< 0.01	21.88
Soluble salt content	1	82.47	18.36	< 0.01	29.66
Residuals	30	134.78
