# Supplementary material for: Soil Moisture and Soluble Salt Content Dominate Changes in Foliar δ13C and δ15N of Desert Communities in the Qaidam Basin, Qinghai-Tibetan Plateau
Source: Front Plant Sci. 2021 Jul 8;12:675817. doi: 10.3389/fpls.2021.675817 (PMC8297661; doi:10.3389/fpls.2021.675817)
Supplement: Supplementary file 4 [file Table_4.XLSX]

## Sheet: Sheet1
TABLE S1 | Site information on location, vegetation and leaf stable isotope during the growing seasonin the Qaidam Basin, northeastern Qinghai-Tibetan Plateau.
Site	Longitude(°E)	Latitude(°N)	Elevation(m)	Sampling time	Season	Species	C3/C4	δ15N	δ13C
Da Qaidam	95.366	37.85	3173	20100618	cool-wet	Ce.latens	C3	10.1113	-27.265
Da Qaidam	95.366	37.85	3173	20100618	cool-wet	Sy.regelii	C3	9.67133	-26.354
Da Qaidam	95.366	37.85	3173	20100618	cool-wet	Sa.abrotanoides	C3	9.401	-26.347
Da Qaidam	95.366	37.85	3173	20100630	cool-wet	Ce.latens	C3	7.52833	-26.3327
Da Qaidam	95.366	37.85	3173	20100630	cool-wet	Sy.regelii	C3	5.91267	-25.3723
Da Qaidam	95.366	37.85	3173	20100630	cool-wet	Sa.abrotanoides	C3	8.10367	-26.2485
Da Qaidam	95.366	37.85	3173	20100715	warm-dry	Ce.latens	C3	6.292	-26.908
Da Qaidam	95.366	37.85	3173	20100715	warm-dry	Sy.regelii	C3	5.39167	-25.766
Da Qaidam	95.366	37.85	3173	20100715	warm-dry	Sa.abrotanoides	C3	6.44333	-25.7213
Da Qaidam	95.366	37.85	3173	20100730	warm-dry	Ce.latens	C3	9.1475	-28.3993
Da Qaidam	95.366	37.85	3173	20100730	warm-dry	Sy.regelii	C3	8.269	-26.5087
Da Qaidam	95.366	37.85	3173	20100730	warm-dry	Sa.abrotanoides	C3	8.631	-26.7743
Da Qaidam	95.366	37.85	3173	20100815	warm-dry	Ce.latens	C3	7.637	-28.6707
Da Qaidam	95.366	37.85	3173	20100815	warm-dry	Sy.regelii	C3	8.18333	-26.1113
Da Qaidam	95.366	37.85	3173	20100815	warm-dry	Sa.abrotanoides	C3	8.4105	-24.753
Da Qaidam	95.366	37.85	3173	20100830	warm-dry	Ce.latens	C3	9.203	-28.4457
Da Qaidam	95.366	37.85	3173	20100830	warm-dry	Sy.regelii	C3	9.58733	-25.9357
Da Qaidam	95.366	37.85	3173	20100830	warm-dry	Sa.abrotanoides	C3	9.76933	-25.5003
Da Qaidam	95.366	37.85	3173	20100915	cool-wet	Ce.latens	C3	10.894	-28.16
Da Qaidam	95.366	37.85	3173	20100915	cool-wet	Sy.regelii	C3	7.05433	-25.046
Da Qaidam	95.366	37.85	3173	20100915	cool-wet	Sa.abrotanoides	C3	6.78433	-23.9653
Da Qaidam	95.366	37.85	3173	20100930	cool-wet	Ce.latens	C3	10.8813	-28.801
Da Qaidam	95.366	37.85	3173	20100930	cool-wet	Sy.regelii	C3	7.74767	-26.0163
Da Qaidam	95.366	37.85	3173	20100930	cool-wet	Sa.abrotanoides	C3	7.9125	-23.945
Delhi	97.367	37.367	2982	20100617	cool-wet	K.gracile	C3	4.28733	-24.4897
Delhi	97.367	37.367	2982	20100617	cool-wet	Sy.regelii	C3	5.66933	-25.1513
Delhi	97.367	37.367	2982	20100630	cool-wet	K.gracile	C3	3.57067	-24.144
Delhi	97.367	37.367	2982	20100630	cool-wet	Sy.regelii	C3	4.41267	-26.453
Delhi	97.367	37.367	2982	20100715	warm-dry	K.gracile	C3	6.59933	-24.151
Delhi	97.367	37.367	2982	20100715	warm-dry	Sy.regelii	C3	3.62967	-26.9097
Delhi	97.367	37.367	2982	20100730	warm-dry	K.gracile	C3	6.437	-22.7923
Delhi	97.367	37.367	2982	20100730	warm-dry	Sy.regelii	C3	8.03567	-25.2817
Delhi	97.367	37.367	2982	20100815	warm-dry	K.gracile	C3	4.86067	-23.518
Delhi	97.367	37.367	2982	20100815	warm-dry	Sy.regelii	C3	6.25767	-25.1517
Delhi	97.367	37.367	2982	20100830	warm-dry	K.gracile	C3	7.64967	-23.9527
Delhi	97.367	37.367	2982	20100830	warm-dry	Sy.regelii	C3	9.95933	-25.7043
Delhi	97.367	37.367	2982	20100915	cool-wet	K.gracile	C3	8.35533	-25.4053
Delhi	97.367	37.367	2982	20100915	cool-wet	Sy.regelii	C3	7.654	-25.307
Delhi	97.367	37.367	2982	20100930	cool-wet	K.gracile	C3	8.48467	-23.7837
Delhi	97.367	37.367	2982	20100930	cool-wet	Sy.regelii	C3	10.1727	-24.9943
Dulan	98.1	36.3	3191	20100616	cool-wet	K.gracile	C3	12.2013	-25.9617
Dulan	98.1	36.3	3191	20100616	cool-wet	Sa.abrotanoides	C3	9.9625	-27.9257
Dulan	98.1	36.3	3191	20100630	cool-wet	K.gracile	C3	12.588	-26.795
Dulan	98.1	36.3	3191	20100630	cool-wet	Sa.abrotanoides	C3	11.5473	-28.5525
Dulan	98.1	36.3	3191	20100715	warm-dry	K.gracile	C3	12.1297	-26.4407
Dulan	98.1	36.3	3191	20100715	warm-dry	Sa.abrotanoides	C3	12.7525	-27.8775
Dulan	98.1	36.3	3191	20100730	warm-dry	K.gracile	C3	12.8767	-26.9027
Dulan	98.1	36.3	3191	20100730	warm-dry	Sa.abrotanoides	C3	11.9377	-27.863
Dulan	98.1	36.3	3191	20100815	warm-dry	K.gracile	C3	12.813	-25.0853
Dulan	98.1	36.3	3191	20100815	warm-dry	Sa.abrotanoides	C3	12.336	-27.144
Dulan	98.1	36.3	3191	20100830	warm-dry	K.gracile	C3	13.993	-26.2243
Dulan	98.1	36.3	3191	20100830	warm-dry	Sa.abrotanoides	C3	13.8535	-27.6453
Dulan	98.1	36.3	3191	20100915	cool-wet	K.gracile	C3	13.5215	-26.672
Dulan	98.1	36.3	3191	20100915	cool-wet	Sa.abrotanoides	C3	12.6813	-24.6517
Dulan	98.1	36.3	3191	20100930	cool-wet	K.gracile	C3	13.8403	-26.351
Dulan	98.1	36.3	3191	20100930	cool-wet	Sa.abrotanoides	C3	12.0853	-24.9647
Golmud	94.9	36.417	2808	20100620	cool-wet	Ce.latens	C3	2.7985	-26.064
Golmud	94.9	36.417	2808	20100620	cool-wet	Sy.regelii	C3	3.34533	-25.105
Golmud	94.9	36.417	2808	20100620	cool-wet	E.sinica	C3	1.5425	-23.836
Golmud	94.9	36.417	2808	20100620	cool-wet	Ca.kozlovi	C4	5.04067	-12.0123
Golmud	94.9	36.417	2808	20100630	cool-wet	Ce.latens	C3	5.12933	-25.2977
Golmud	94.9	36.417	2808	20100630	cool-wet	Sy.regelii	C3	2.34467	-25.849
Golmud	94.9	36.417	2808	20100630	cool-wet	E.sinica	C3	1.11767	-24.2807
Golmud	94.9	36.417	2808	20100630	cool-wet	Ca.kozlovi	C4	5.11567	-12.117
Golmud	94.9	36.417	2808	20100709	warm-dry	Ce.latens	C3	4.44433	-26.204
Golmud	94.9	36.417	2808	20100709	warm-dry	Sy.regelii	C3	3.684	-26.7083
Golmud	94.9	36.417	2808	20100709	warm-dry	E.sinica	C3	2.229	-24.2857
Golmud	94.9	36.417	2808	20100709	warm-dry	Ca.kozlovi	C4	5.76833	-11.648
Golmud	94.9	36.417	2808	20100715	warm-dry	Ce.latens	C3	5.84067	-25.6033
Golmud	94.9	36.417	2808	20100715	warm-dry	Sy.regelii	C3	2.5185	-26.1007
Golmud	94.9	36.417	2808	20100715	warm-dry	E.sinica	C3	1.058	-24.038
Golmud	94.9	36.417	2808	20100715	warm-dry	Ca.kozlovi	C4	4.004	-12.1973
Golmud	94.9	36.417	2808	20100730	warm-dry	Ce.latens	C3	4.97567	-27.4887
Golmud	94.9	36.417	2808	20100730	warm-dry	Sy.regelii	C3	4.13767	-27.4827
Golmud	94.9	36.417	2808	20100730	warm-dry	E.sinica	C3	1.29067	-24.19
Golmud	94.9	36.417	2808	20100730	warm-dry	Ca.kozlovi	C4	4.22833	-13.06
Golmud	94.9	36.417	2808	20100815	warm-dry	Ce.latens	C3	3.83267	-26.005
Golmud	94.9	36.417	2808	20100815	warm-dry	Sy.regelii	C3	4.56967	-26.2937
Golmud	94.9	36.417	2808	20100815	warm-dry	E.sinica	C3	1.4625	-24.943
Golmud	94.9	36.417	2808	20100815	warm-dry	Ca.kozlovi	C4	3.65333	-13.665
Golmud	94.9	36.417	2808	20100830	warm-dry	Ce.latens	C3	6.35933	-27.011
Golmud	94.9	36.417	2808	20100830	warm-dry	Sy.regelii	C3	3.813	-26.628
Golmud	94.9	36.417	2808	20100830	warm-dry	E.sinica	C3	1.31167	-25.0853
Golmud	94.9	36.417	2808	20100830	warm-dry	Ca.kozlovi	C4	2.59967	-13.904
Golmud	94.9	36.417	2808	20100915	cool-wet	Ce.latens	C3	6.503	-26.948
Golmud	94.9	36.417	2808	20100915	cool-wet	Sy.regelii	C3	4.221	-26.27
Golmud	94.9	36.417	2808	20100915	cool-wet	E.sinica	C3	1.2725	-25.2677
Golmud	94.9	36.417	2808	20100915	cool-wet	Ca.kozlovi	C4	2.32667	-13.6453
Golmud	94.9	36.417	2808	20100930	cool-wet	Ce.latens	C3	6.473	-27.27
Golmud	94.9	36.417	2808	20100930	cool-wet	Sy.regelii	C3	4.42267	-26.546
Golmud	94.9	36.417	2808	20100930	cool-wet	E.sinica	C3	1.605	-24.8133
Golmud	94.9	36.417	2808	20100930	cool-wet	Ca.kozlovi	C4	2.37567	-13.27
Nuomuhong	96.417	36.433	2790	20100615	cool-wet	Ce.latens	C3	5.32	-25.0413
Nuomuhong	96.417	36.433	2790	20100615	cool-wet	E.sinica	C3	3.80333	-24.285
Nuomuhong	96.417	36.433	2790	20100615	cool-wet	T.chinensis	C3	2.04633	-24.7293
Nuomuhong	96.417	36.433	2790	20100615	cool-wet	N.tangutorum	C3	4.10033	-25.6333
Nuomuhong	96.417	36.433	2790	20100615	cool-wet	Ca.kozlovi	C4	4.71	-11.897
Nuomuhong	96.417	36.433	2790	20100630	cool-wet	Ce.latens	C3	4.54267	-25.9093
Nuomuhong	96.417	36.433	2790	20100630	cool-wet	E.sinica	C3	3.16467	-24.1623
Nuomuhong	96.417	36.433	2790	20100630	cool-wet	T.chinensis	C3	2.82267	-26.4637
Nuomuhong	96.417	36.433	2790	20100630	cool-wet	N.tangutorum	C3	3.59067	-26.524
Nuomuhong	96.417	36.433	2790	20100630	cool-wet	Ca.kozlovi	C4	3.875	-12.5923
Nuomuhong	96.417	36.433	2790	20100715	warm-dry	Ce.latens	C3	5.257	-26.0143
Nuomuhong	96.417	36.433	2790	20100715	warm-dry	E.sinica	C3	2.98933	-24.6923
Nuomuhong	96.417	36.433	2790	20100715	warm-dry	T.chinensis	C3	2.04433	-25.5603
Nuomuhong	96.417	36.433	2790	20100715	warm-dry	N.tangutorum	C3	4.18033	-26.657
Nuomuhong	96.417	36.433	2790	20100715	warm-dry	Ca.kozlovi	C4	4.78367	-12.3973
Nuomuhong	96.417	36.433	2790	20100730	warm-dry	Ce.latens	C3	5.949	-27.069
Nuomuhong	96.417	36.433	2790	20100730	warm-dry	E.sinica	C3	3.35367	-24.9287
Nuomuhong	96.417	36.433	2790	20100730	warm-dry	T.chinensis	C3	3.058	-25.696
Nuomuhong	96.417	36.433	2790	20100730	warm-dry	N.tangutorum	C3	3.97567	-26.2733
Nuomuhong	96.417	36.433	2790	20100730	warm-dry	Ca.kozlovi	C4	5.35633	-12.462
Nuomuhong	96.417	36.433	2790	20100815	warm-dry	Ce.latens	C3	5.43133	-27.0803
Nuomuhong	96.417	36.433	2790	20100815	warm-dry	E.sinica	C3	3.097	-25.6693
Nuomuhong	96.417	36.433	2790	20100815	warm-dry	T.chinensis	C3	1.60033	-26.162
Nuomuhong	96.417	36.433	2790	20100815	warm-dry	N.tangutorum	C3	4.47367	-26.9173
Nuomuhong	96.417	36.433	2790	20100815	warm-dry	Ca.kozlovi	C4	4.731	-12.954
Nuomuhong	96.417	36.433	2790	20100830	warm-dry	Ce.latens	C3	5.386	-26.0947
Nuomuhong	96.417	36.433	2790	20100830	warm-dry	E.sinica	C3	4.01633	-24.187
Nuomuhong	96.417	36.433	2790	20100830	warm-dry	T.chinensis	C3	2.202	-26.0627
Nuomuhong	96.417	36.433	2790	20100830	warm-dry	N.tangutorum	C3	4.34033	-27.299
Nuomuhong	96.417	36.433	2790	20100830	warm-dry	Ca.kozlovi	C4	4.42067	-13.5303
Nuomuhong	96.417	36.433	2790	20100915	cool-wet	Ce.latens	C3	6.29733	-26.6373
Nuomuhong	96.417	36.433	2790	20100915	cool-wet	E.sinica	C3	3.95267	-25.7097
Nuomuhong	96.417	36.433	2790	20100915	cool-wet	T.chinensis	C3	1.60689	-25.7247
Nuomuhong	96.417	36.433	2790	20100915	cool-wet	N.tangutorum	C3	4.93333	-27.882
Nuomuhong	96.417	36.433	2790	20100915	cool-wet	Ca.kozlovi	C4	4.53133	-13.4677
Nuomuhong	96.417	36.433	2790	20100930	cool-wet	Ce.latens	C3	6.62867	-26.4547
Nuomuhong	96.417	36.433	2790	20100930	cool-wet	E.sinica	C3	3.51733	-25.5973
Nuomuhong	96.417	36.433	2790	20100930	cool-wet	T.chinensis	C3	1.67833	-26.174
Nuomuhong	96.417	36.433	2790	20100930	cool-wet	N.tangutorum	C3	4.434	-27.1647
Nuomuhong	96.417	36.433	2790	20100930	cool-wet	Ca.kozlovi	C4	3.567	-13.3553
