# Supplementary material for: Soil Moisture and Soluble Salt Content Dominate Changes in Foliar δ13C and δ15N of Desert Communities in the Qaidam Basin, Qinghai-Tibetan Plateau
Source: Front Plant Sci. 2021 Jul 8;12:675817. doi: 10.3389/fpls.2021.675817 (PMC8297661; doi:10.3389/fpls.2021.675817)
Supplement: Supplementary file 5 [file Table_5.XLSX]

## Sheet: Sheet1
TABLE S1 | Main effects of environmental variables on δ15N and δ13C in multivariate linear full models. d.f., the degree of freedom; SS, sum square, F, variance ratio; P, significance level; η2, Eta squared, the percentage of sum squares explained. See other abbreviations in Tables 1 and 2
	d.f.	SS	F	P	η2(%)
δ15N
GST	1	74.3181	267.333	3.70987e-14	28.0408
GSP	1	16.5827	59.6505	7.80266e-08	6.25681
Aridity	1	1.04067	3.74344	0.0654076	0.392653
SOC	1	47.0525	169.255	4.33485e-12	17.7533
STN	1	5.51204	19.8276	0.000182087	2.07974
Soil.moisture	1	111.627	401.539	4.63742e-16	42.1179
Bulk.density	1	0.0494968	0.178047	0.676975	0.0186756
PH	1	2.45307	8.82407	0.00684737	0.925566
Soluble.salts	1	0.00526356	0.0189338	0.891754	0.00198599
Residuals	23	6.39396	NA	NA	NA
δ13C
GST	1	60.8429	27.4244	2.59728e-05	21.8786
GSP	1	6.5223	2.93988	0.0998628	2.34536
Aridity	1	16.5599	7.46424	0.0118801	5.95479
SOC	1	5.6475	2.54557	0.124254	2.03079
STN	1	8.87474	4.00022	0.0574383	3.19128
Soil.moisture	1	0.0914529	0.0412217	0.840896	0.0328857
Bulk.density	1	1.9097	0.860784	0.363154	0.686712
PH	1	0.0940819	0.0424067	0.838658	0.033831
Soluble.salts	1	126.524	57.0298	1.1367e-07	45.497
Residuals	23	51.027	NA	NA	NA
