# Supplementary material for: Soil Moisture and Soluble Salt Content Dominate Changes in Foliar δ13C and δ15N of Desert Communities in the Qaidam Basin, Qinghai-Tibetan Plateau
Source: Front Plant Sci. 2021 Jul 8;12:675817. doi: 10.3389/fpls.2021.675817 (PMC8297661; doi:10.3389/fpls.2021.675817)
Supplement: Supplementary Table 1 — Site information of δ15N and δ13C during the growing season in 2010 in the Qaidam Basin, northeastern Qinghai-Tibetan Plateau. [file Table_1.XLSX]

## Sheet: Sheet1
TABLE 1 | Site locations, soil properties and climate regimes in the Qaidam Basin, northeastern Qinghai-Tibetan Plateau. Soil variables include total soil nitrogen (STN), soil organic carbon (SOC), soil moisture (SM), bulk density (BD), pH and soil soluble salts (SS) at the 0–30 cm layer. Climatic factors are the sum precipitation and average temperature during plant growing season (GSP and GST, …
Sites	Sampling year	Long.(°E)	Lat.(°N)	Alt.(m)	SOC (g kg−1)	STN (g kg−1)	SM(%)	BD (g cm-3)	pH	SS(EC25µs cm-1)	GSP(mm)	GST(°C)	Aridity (mm °C−1)
Golmud-1	2005	94.501	35.866	3620	1.27	0.12	3.2	1.55	8.28	262.47	146.88	11.97	21.21
Golmud-2	2005	95.702	36.752	2842	1.1	0.18	3.1	1.46	8.57	1046.66	46.76	16.8	21.52
Golmud-3	2005	96.786	36.239	2827	1.41	0.48	3.65	1.52	9.05	1868.07	104.17	16.37	15.03
Dulan-1	2005	98.307	36.949	3302	2.49	0.19	10.07	1.36	9.4	302.71	167.9	11.79	2.9
Delhi-1	2005	96.699	37.637	2873	2.34	0.35	3.39	1.67	9.03	567.28	109.17	15.89	9.31
Da Qaidam-1	2005	95.967	37.042	3327	2.64	0.25	4.02	1.63	8.1	815.06	54.25	13.76	17.48
Da Qaidam-2	2005	95.165	37.352	3180	1.43	0.47	7.62	1.64	7.89	910.87	38.94	14.72	21.51
Da Qaidam-3	2005	95.506	37.737	3041	1.84	0.44	0.7	1.76	7.87	536.69	68.59	15.38	11.8
Ulan	2005	98.203	36.74	2969	2.98	1.12	9.44	1.37	8.45	1544.26	161.59	14.01	3.33
Delhi-2	2005	98.203	36.749	2850	2.22	0.38	4.89	1.54	8.93	903.52	161.59	14.73	3.34
Chaka	2005	98.754	36.078	3597	4.37	0.3	12.19	1.54	8.58	1642.37	214.65	9.99	2.11
Da Qaidam-4	2010	95.366	37.85	3173	12.38	0.29	2.63	1.76	7.87	536.69	93.1	15.4	7.47
Delhi-3	2010	97.367	37.367	2982	5.35	0.38	2.22	1.67	8.52	1107.95	169.9	15.99	3.89
Dulan-2	2010	98.1	36.3	3191	3.3	0.5	9.92	1.37	8.64	155.06	237.3	13.86	3.49
Golmud-4	2010	94.9	36.417	2808	1.48	0.09	2.73	1.55	8.1	2787.09	69.5	17.36	13.11
Nuomuhong	2010	96.417	36.433	2790	2.2	0.12	1.74	1.52	9.05	1868.07	128	17.19	7.92
