# Supplementary material for: Soil Moisture and Soluble Salt Content Dominate Changes in Foliar δ13C and δ15N of Desert Communities in the Qaidam Basin, Qinghai-Tibetan Plateau
Source: Front Plant Sci. 2021 Jul 8;12:675817. doi: 10.3389/fpls.2021.675817 (PMC8297661; doi:10.3389/fpls.2021.675817)
Supplement: Supplementary Table 2 — The full models of multivariate linear for δ15N and δ13C. d.f., the degree of freedom; SS, sum square, F, variance ratio; P, significance level; η2, Eta squared, the percentage of sum squares explained. See other abbreviations in Tables 1, 2. [file Table_2.XLSX]

## Sheet: Sheet1
TABLE 2 | Plant cover, nitrogen isotopic composition (15N, ‰) and carbon isotopic composition 13C, ‰) of species measured at each site. For species abbreviations, C.l., Ceratoides latens; C.k., Calligogum kozlovi (C4); E.s., Ephedra sinica; H.a., Haloxylon ammodendron (C4); K.g., Kalidium gracile; N.t., Nitraria tangutorum; R.s., Reaumuria soongorica; S.a., Salsola abrotanoides; S.r., Sympegma…
Site	Species-Cover					Species-d15N					Species-d13C
Golmud-1	C.l.	S.a.				C.l.	S.a.				C.l.	S.a.
	80	20				11.31	12				-24.75	-24.76
Golmud-2	T.c	C.k.				T.c	C.k.				T.c	C.k.
	98	2				10.42	15.9				-25.48	-13.13
Golmud-3	S.r.	H.a.				S.r.	H.a.				S.r.	H.a.
	10	90				9.37	11.57				-23.04	-15.11
Dulan-1	R.s.	S.a.				R.s.	S.a.				R.s.	S.a.
	3	97				13.59	18.82				-27.54	-27.43
Delhi-1	S.r.					S.r.					S.r.
	100					9.51					-24.09
Da Qaidam-1	C.l.	S.r.	S.a.			C.l.	S.r.	S.a.			C.l.	S.r.	S.a.
	90	5	5			7.81	9.02	10.84			-24.92	-23.65	-22.92
Da Qaidam-2	C.l.	S.a.				C.l.	S.a.				C.l.	S.a.
	63	37				12.02	14.61				-24.67	-23.21
Da Qaidam-3	S.r.	E.s.				S.r.	E.s.				S.r.	E.s.
	24	76				7.65	7.91				-23.81	-22.22
Ulan	S.a.					S.a.					S.a.
	1					9.51					-24.09
Delhi-2	K.g.	S.a.	C.l.			K.g.	S.a.	C.l.			K.g.	S.a.	C.l.
	19	15	66			10.52	15.53	11.14			-26.6	-23.67	-25.54
Chaka	S.a.	C.l.				S.a.	C.l.				S.a.	C.l.
	46	54				14.24	13.34				-25.73	-25.82
Da Qaidam-4	S.a.	C.l.	S.r.			S.a.	C.l.	S.r.			S.a.	C.l.	S.r.
	32	37	31			8.63	9.15	8.27			-26.77	-28.4	-26.51
Delhi-3	S.r.	K.g.				S.r.	K.g.				S.r.	K.g.
	25	75				8.04	6.44				-25.28	-22.79
Dulan-2	K.g.	S.a.				K.g.	S.a.				K.g.	S.a.
	95	5				12.88	11.94				-26.9	-27.86
Golmud-4	C.l.	S.r.	E.s.	C.k.		C.l.	S.r.	E.s.	C.k.		C.l.	S.r.	E.s.	C.k.
	18	30	12	40		4.98	4.14	1.29	4.23		-27.49	-27.48	-24.19	-13.06
Nuomuhong	C.l.	N.t.	E.s.	T.c.	C.k.	C.l.	N.t.	E.s.	T.c.	C.k.	C.l.	N.t.	E.s.	T.c.	C.k.
	10	15	35	10	30	5.95	3.98	3.35	3.06	5.36	-27.07	-26.27	-24.93	-25.7	-12.46
